# Supplementary material for: Potassium and Cesium Fluorinated β-Diketonates: Effect of a Cation and Terminal Substituent on Structural and Thermal Properties
Source: MDPI journal article supplement (doi:10.3390/molecules28155886), 2023-08-04
Supplement: s1 [file s1]

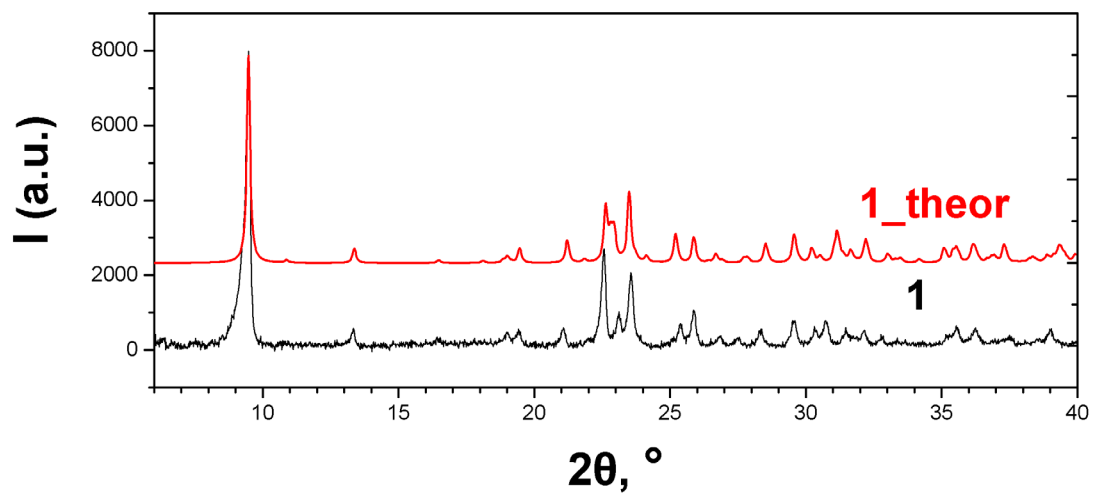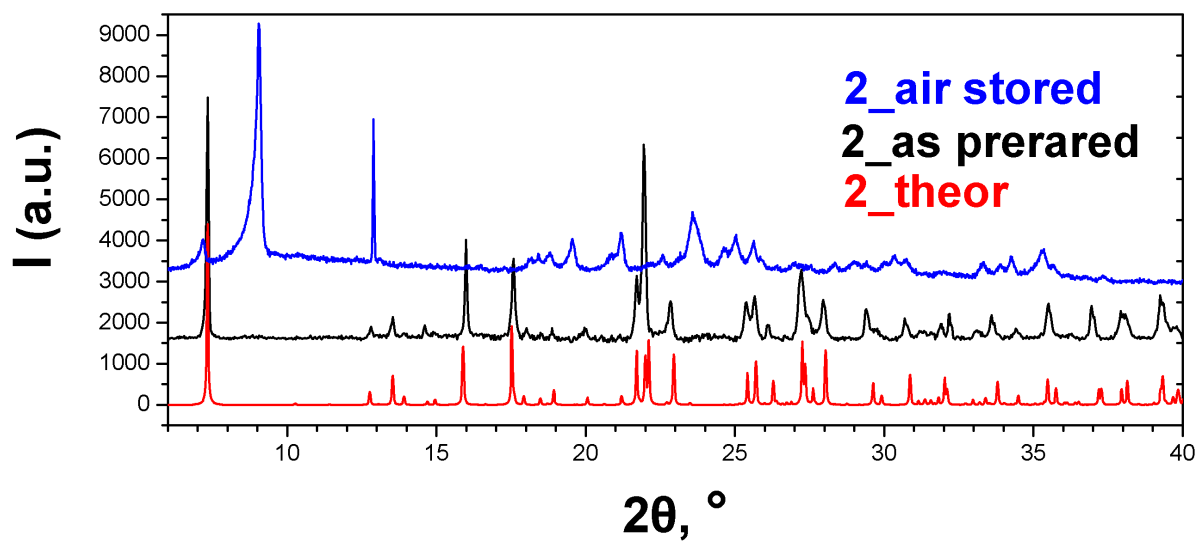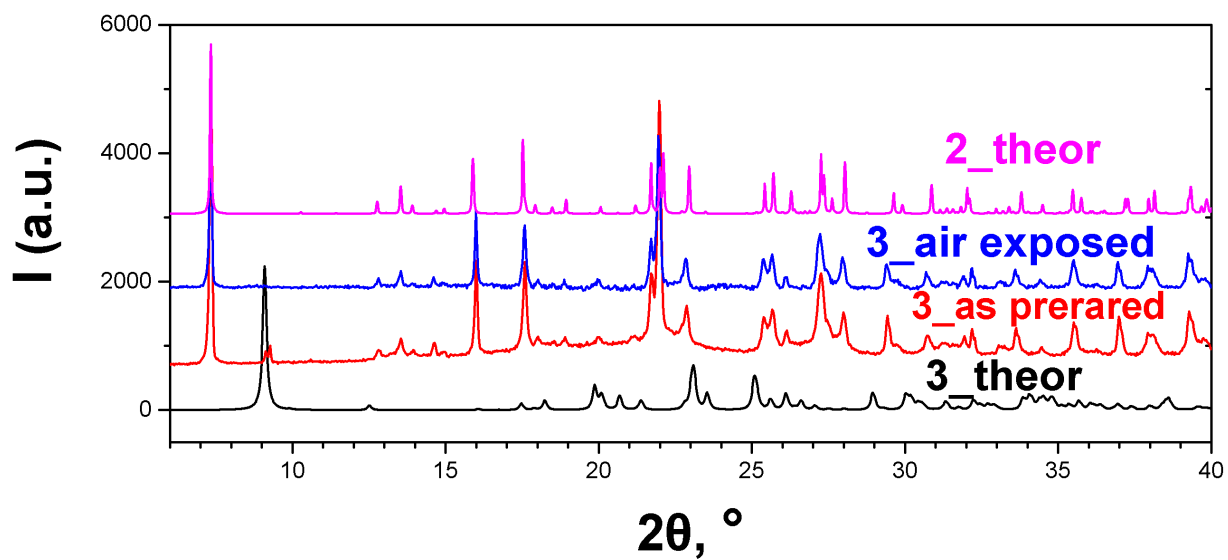

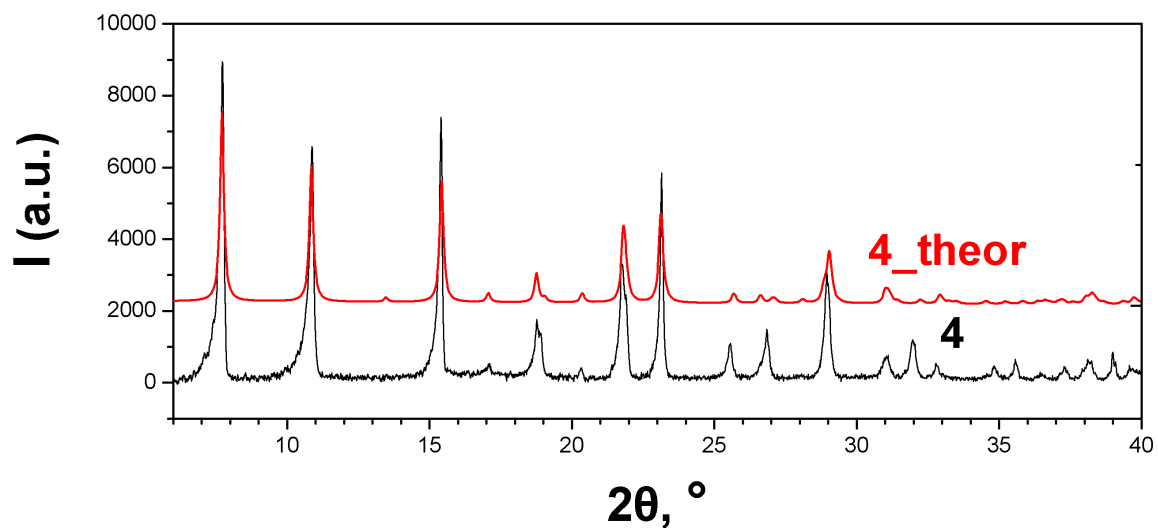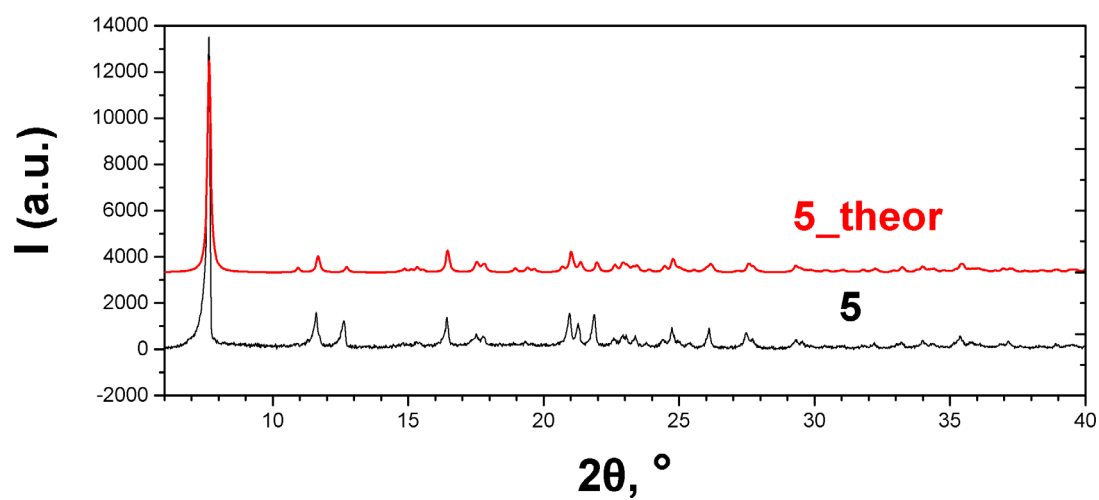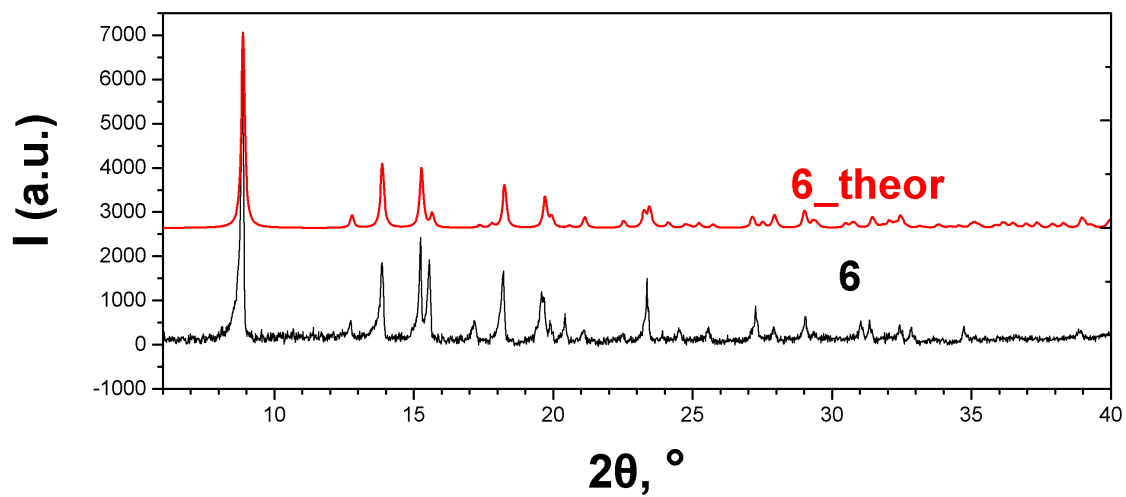

**Figure S1.** Experimental (bottom black) and calculated (top red) powder XRD patterns of 1-6.

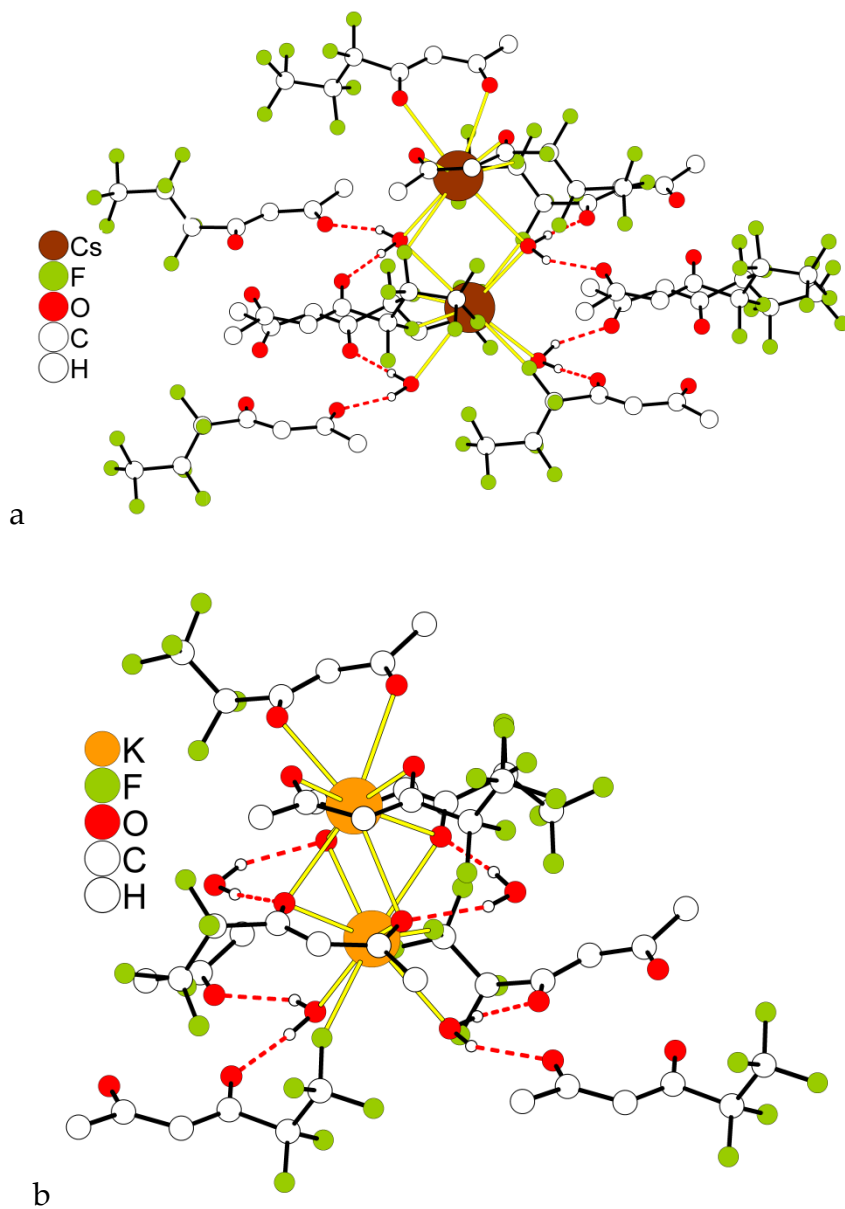

**Figure S2.** The fragments of the structures of  $\text{Cs}(\text{Me}..\text{C}_3\text{F}_7)(\text{H}_2\text{O})$  (a) and  $\text{K}(\text{Me}..\text{C}_2\text{F}_5)(\text{H}_2\text{O})$  (b) showing hydrogen bonds between water molecules and anion oxygen atoms (red dotted line).

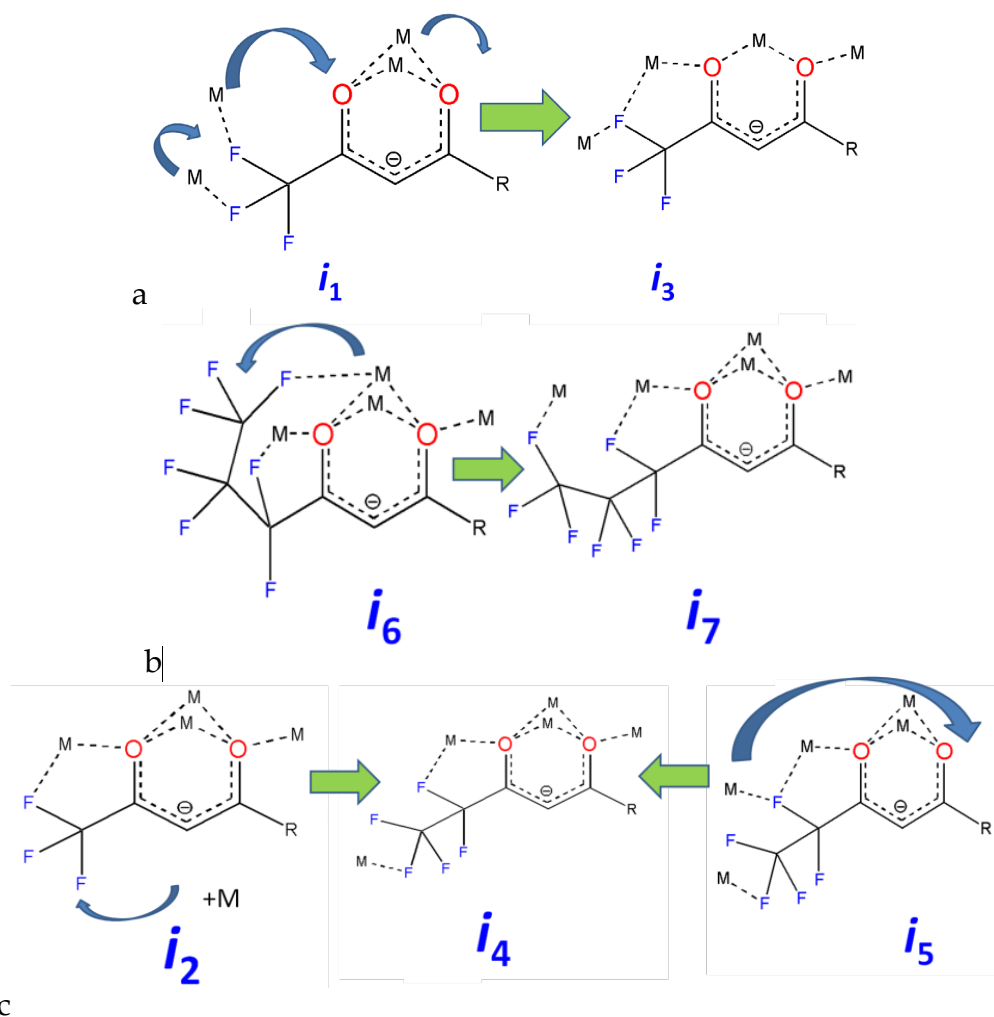

**Figure S3.** Relationships between the coordination modes of  $\beta$ -diketonate ligands.

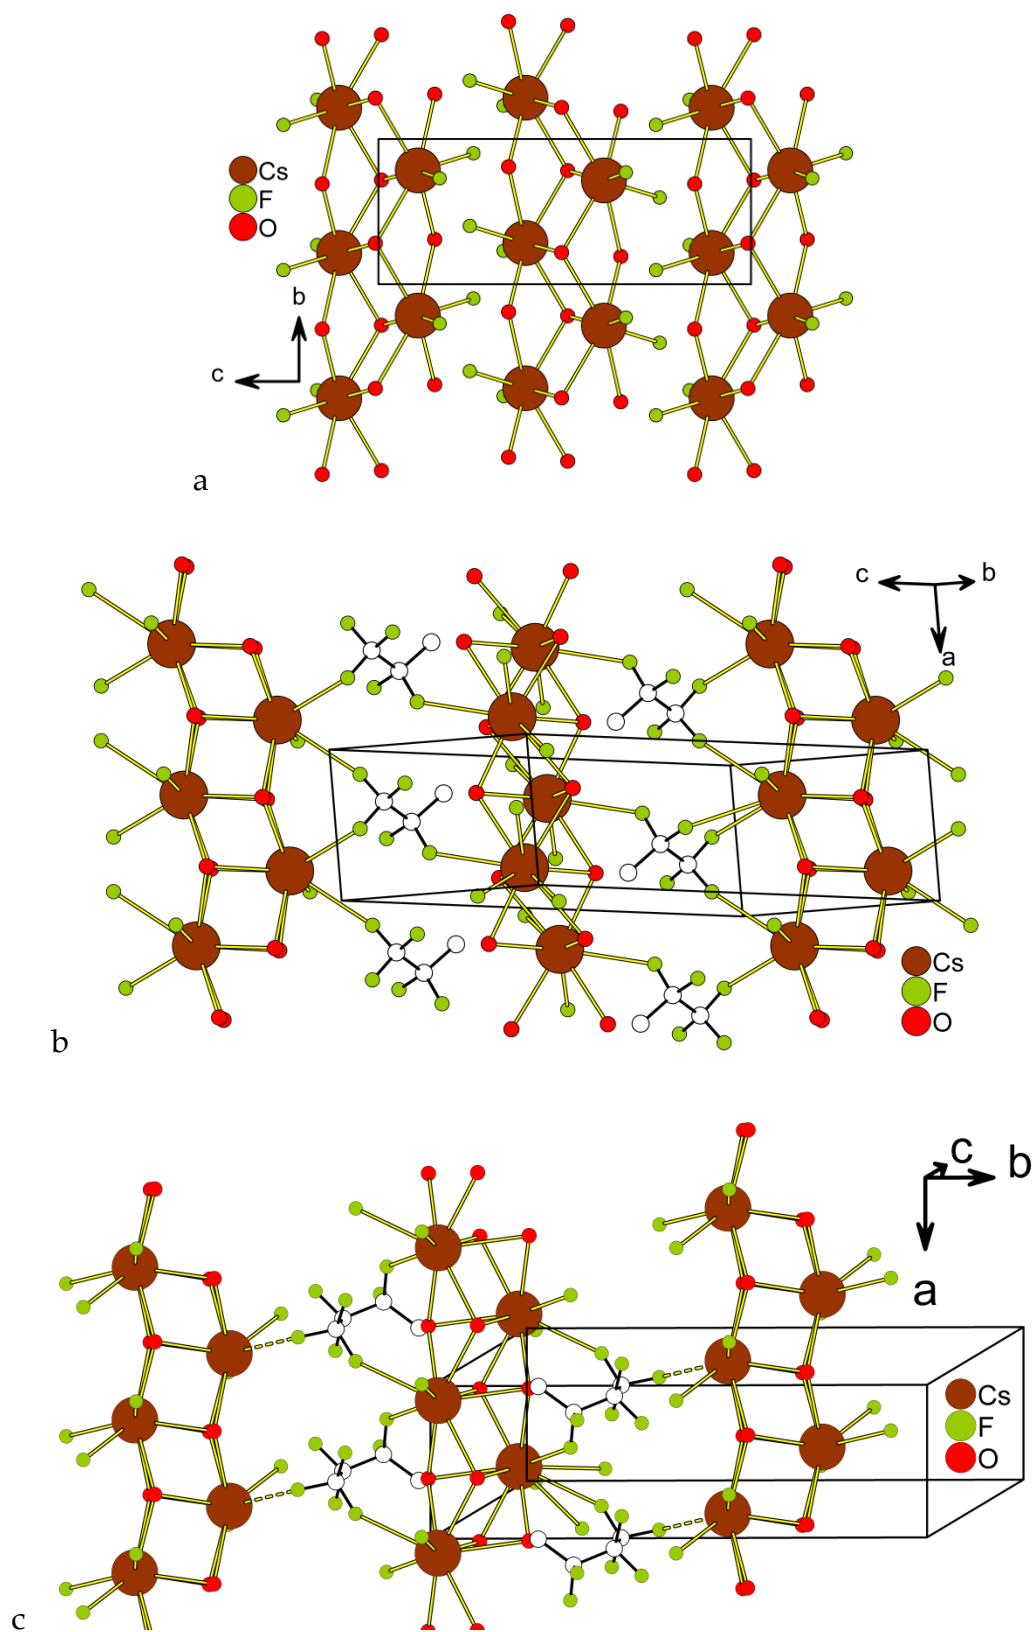

**Figure S4.** The fragments of the structures of  $\text{Cs}(\text{Me}..\text{CF}_3)$  (a),  $\text{Cs}(\text{Me}..\text{C}_2\text{F}_5)$  (b) and  $\text{Cs}(\text{Me}..\text{C}_3\text{F}_7)$  (c). Carbon and hydrogen atoms are omitted.

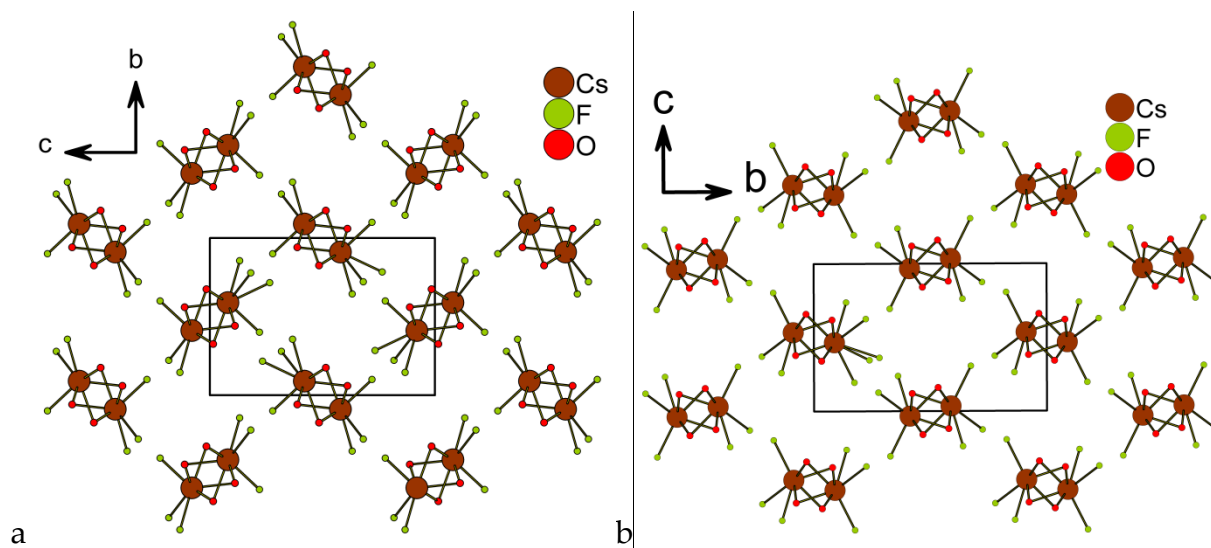

**Figure S5.** Hexagonal motif of cesium cation packing in the structures  $\text{Cs}(\text{Me}..\text{C}_2\text{F}_5)$  (a) and  $\text{Cs}(\text{Me}..\text{C}_3\text{F}_7)$  (b).

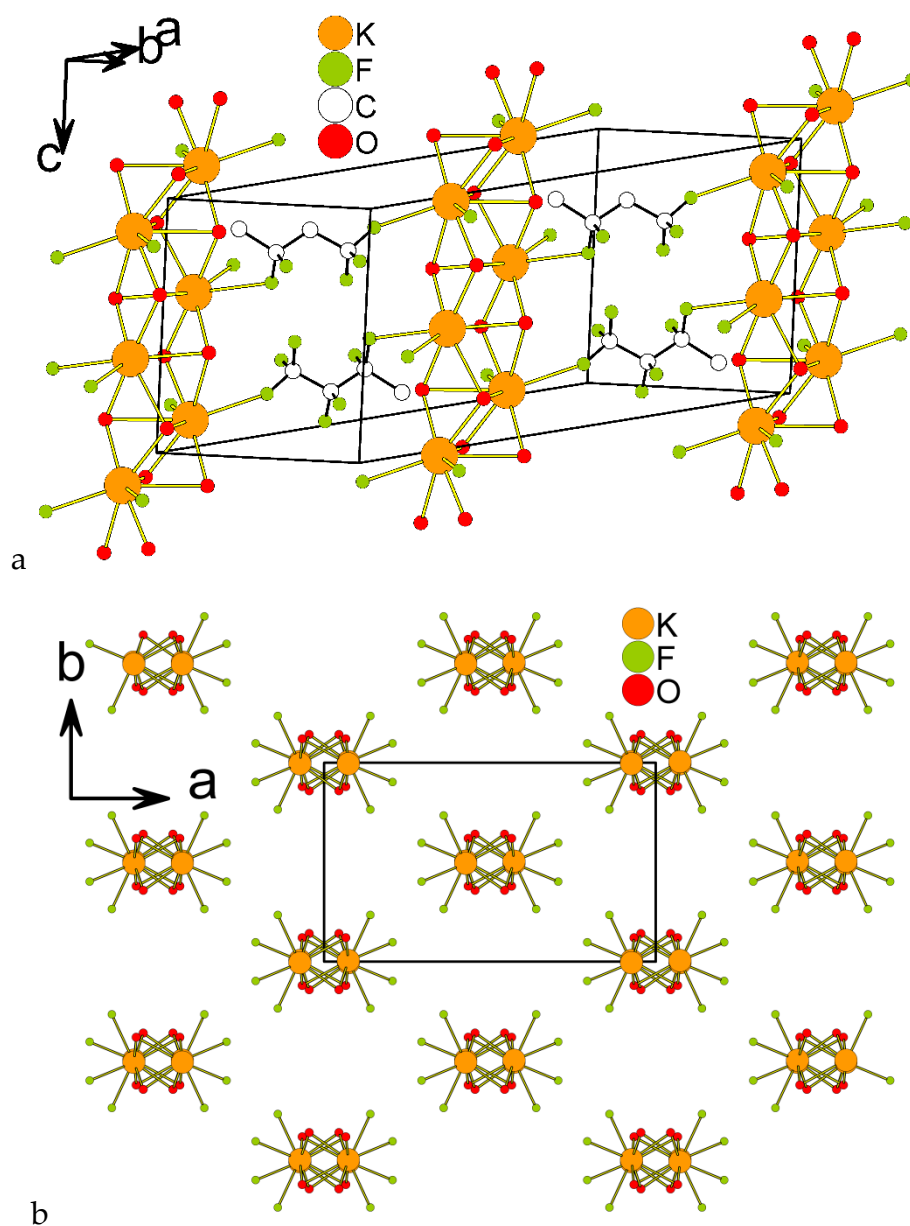

**Figure S6.** The fragment of "double chains" (a) and hexagonal motif of potassium cation packing (b) in the structure of  $\text{K}(\text{Me}..\text{C}_3\text{F}_7)$ .

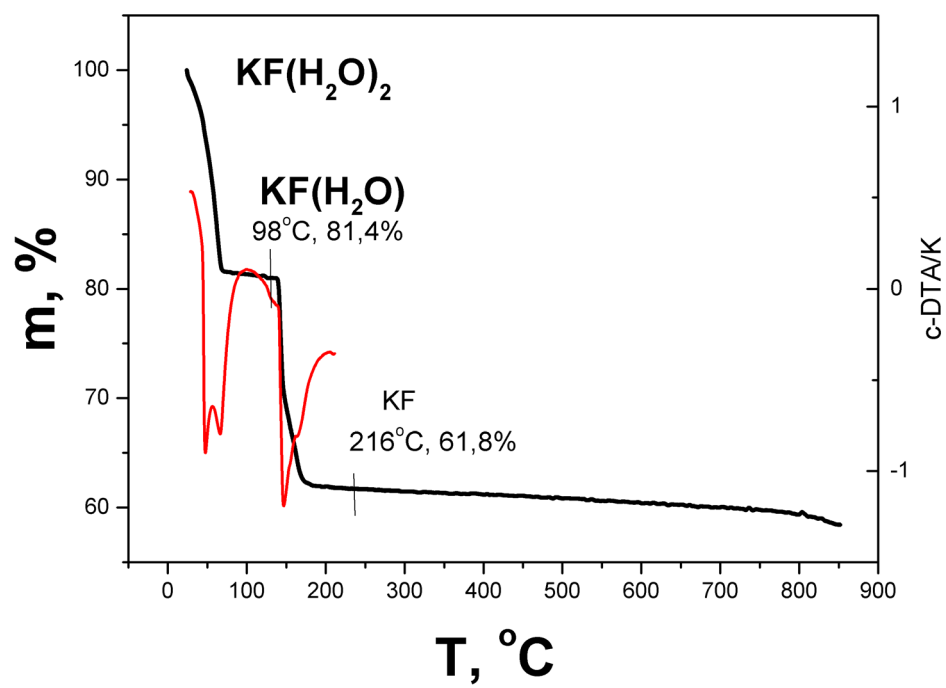

**Figure S7.** Thermal analysis data for  $\text{KF}(\text{H}_2\text{O})_2$ .

**Table S1.** Crystallographic data and experimental conditions for complexes from **1** to **6**.

| Identification                                               | Cs(Me..C <sub>2</sub> F <sub>5</sub> ) ( <b>1</b> )             | Cs(Me..C <sub>3</sub> F <sub>7</sub> )(H <sub>2</sub> O) ( <b>2</b> ) | Cs(Me..C <sub>3</sub> F <sub>7</sub> ) ( <b>3</b> )             | K(Me..C <sub>2</sub> F <sub>5</sub> )(H <sub>2</sub> O) ( <b>4</b> ) | K(Me..C <sub>2</sub> F <sub>5</sub> ) ( <b>5</b> )                | K(Me..C <sub>3</sub> F <sub>7</sub> ) ( <b>6</b> )               |
|--------------------------------------------------------------|-----------------------------------------------------------------|-----------------------------------------------------------------------|-----------------------------------------------------------------|----------------------------------------------------------------------|-------------------------------------------------------------------|------------------------------------------------------------------|
| Empirical formula                                            | C <sub>6</sub> H <sub>4</sub> F <sub>5</sub> O <sub>2</sub> Cs  | C <sub>7</sub> H <sub>6</sub> F <sub>7</sub> O <sub>3</sub> Cs        | C <sub>7</sub> H <sub>4</sub> F <sub>7</sub> O <sub>2</sub> Cs  | C <sub>6</sub> H <sub>6</sub> F <sub>5</sub> O <sub>3</sub> K        | C <sub>6</sub> H <sub>4</sub> F <sub>5</sub> O <sub>2</sub> K     | C <sub>7</sub> H <sub>4</sub> F <sub>7</sub> O <sub>2</sub> K    |
| Formula weight, g·mol <sup>-1</sup>                          | 336.00                                                          | 404.03                                                                | 386.01                                                          | 260.21                                                               | 242.19                                                            | 292.20                                                           |
| Temperature, K                                               | 150(2)                                                          | 220(2)                                                                | 220(2)                                                          | 150(2)                                                               | 220(2)                                                            | 150(2)                                                           |
| Crystal system                                               | Monoclinic                                                      | Monoclinic                                                            | Monoclinic                                                      | Orthorhombic                                                         | Monoclinic                                                        | Monoclinic                                                       |
| Space group                                                  | <i>P</i> 2 <sub>1</sub> / <i>n</i>                              | <i>C</i> 2/ <i>c</i>                                                  | <i>P</i> 2 <sub>1</sub> / <i>n</i>                              | <i>F</i> 222                                                         | <i>P</i> 2 <sub>1</sub> / <i>n</i>                                | <i>C</i> 2/ <i>c</i>                                             |
| <i>a</i> , Å                                                 | 5.0200(2)                                                       | 24.3346(5)                                                            | 5.2090(2)                                                       | 10.4169(3)                                                           | 12.7927(2)                                                        | 19.5487(9)                                                       |
| <i>b</i> , Å                                                 | 11.3276(6)                                                      | 11.1421(3)                                                            | 17.7467(6)                                                      | 15.9907(7)                                                           | 9.9460(2)                                                         | 11.6001(5)                                                       |
| <i>c</i> , Å                                                 | 16.2747(8)                                                      | 18.1783(4)                                                            | 11.4557(5)                                                      | 22.8244(11)                                                          | 15.2075(3)                                                        | 9.0170(3)                                                        |
| $\alpha$ , °                                                 | 90                                                              | 90                                                                    | 90                                                              | 90                                                                   | 90                                                                | 90                                                               |
| $\beta$ , °                                                  | 95.7280(10)                                                     | 97.9520(10)                                                           | 100.5900(10)                                                    | 90                                                                   | 113.8260(10)                                                      | 99.1330(10)                                                      |
| $\gamma$ , °                                                 | 90                                                              | 90                                                                    | 90                                                              | 90                                                                   | 90                                                                | 90                                                               |
| Volume, Å <sup>3</sup>                                       | 920.83(8)                                                       | 4881.4(2)                                                             | 1040.96(7)                                                      | 3801.9(3)                                                            | 1770.04(6)                                                        | 2018.83(14)                                                      |
| Z                                                            | 4                                                               | 16                                                                    | 4                                                               | 16                                                                   | 8                                                                 | 8                                                                |
| Density (calculated), g/cm <sup>3</sup>                      | 2.424                                                           | 2.199                                                                 | 2.463                                                           | 1.818                                                                | 1.818                                                             | 1.923                                                            |
| Absorption coefficient, mm <sup>-1</sup>                     | 4.072                                                           | 3.121                                                                 | 3.646                                                           | 0.622                                                                | 0.653                                                             | 0.618                                                            |
| F(000)                                                       | 624                                                             | 3040                                                                  | 720                                                             | 2080                                                                 | 960                                                               | 1152                                                             |
| Crystal size, mm <sup>3</sup>                                | 0.45 x 0.05 x 0.02                                              | 0.21 x 0.20 x 0.16                                                    | 0.15 x 0.04 x 0.03                                              | 0.32 x 0.22 x 0.10                                                   | 0.21 x 0.19 x 0.08                                                | 0.36 x 0.09 x 0.05                                               |
| Theta range for data collection, °                           | 2.194 to 27.567                                                 | 2.252 to 27.094                                                       | 2.142 to 27.512                                                 | 2.498 to 27.108                                                      | 2.517 to 27.076                                                   | 2.048 to 27.557                                                  |
| Index ranges                                                 | -5 ≤ <i>h</i> ≤ 6<br>-12 ≤ <i>k</i> ≤ 14<br>-21 ≤ <i>l</i> ≤ 20 | -31 ≤ <i>h</i> ≤ 28<br>-14 ≤ <i>k</i> ≤ 14<br>-20 ≤ <i>l</i> ≤ 23     | -6 ≤ <i>h</i> ≤ 6<br>-23 ≤ <i>k</i> ≤ 23<br>-14 ≤ <i>l</i> ≤ 14 | -8 ≤ <i>h</i> ≤ 12<br>-20 ≤ <i>k</i> ≤ 20<br>-24 ≤ <i>l</i> ≤ 29     | -16 ≤ <i>h</i> ≤ 15<br>-11 ≤ <i>k</i> ≤ 12<br>-19 ≤ <i>l</i> ≤ 19 | -25 ≤ <i>h</i> ≤ 25<br>-15 ≤ <i>k</i> ≤ 15<br>-11 ≤ <i>l</i> ≤ 7 |
| Reflections collected                                        | 6564                                                            | 19502                                                                 | 11753                                                           | 4652                                                                 | 16039                                                             | 7562                                                             |
| Independent reflections                                      | 2125                                                            | 5337                                                                  | 2388                                                            | 2013                                                                 | 3895                                                              | 2307                                                             |
| R(int)                                                       | 0.0312                                                          | 0.0370                                                                | 0.0268                                                          | 0.0193                                                               | 0.0360                                                            | 0.0311                                                           |
| Completeness to theta = 25.25°, %                            | 100.0 %                                                         | 99.3 %                                                                | 99.6 %                                                          | 97.6 %                                                               | 99.9 %                                                            | 99.7 %                                                           |
| Data / restraints / parameters                               | 2125 / 0 / 129                                                  | 5337 / 47 / 370                                                       | 2388 / 0 / 155                                                  | 2013 / 2 / 148                                                       | 3895 / 0 / 255                                                    | 2307 / 0 / 155                                                   |
| Goodness-of-fit on F <sup>2</sup>                            | 1.085                                                           | 1.064                                                                 | 1.228                                                           | 1.079                                                                | 1.047                                                             | 1.065                                                            |
| Final R indices [ <i>I</i> > 2sigma( <i>I</i> )]             | R <sub>1</sub> = 0.0204<br>wR <sub>2</sub> = 0.0505             | R <sub>1</sub> = 0.0335<br>wR <sub>2</sub> = 0.0892                   | R <sub>1</sub> = 0.0306<br>wR <sub>2</sub> = 0.0683             | R <sub>1</sub> = 0.0227<br>wR <sub>2</sub> = 0.0595                  | R <sub>1</sub> = 0.0323<br>wR <sub>2</sub> = 0.0769               | R <sub>1</sub> = 0.0332<br>wR <sub>2</sub> = 0.0871              |
| R indices (all data)                                         | R <sub>1</sub> = 0.0244<br>wR <sub>2</sub> = 0.0518             | R <sub>1</sub> = 0.0460<br>wR <sub>2</sub> = 0.0946                   | R <sub>1</sub> = 0.0331<br>wR <sub>2</sub> = 0.0691             | R <sub>1</sub> = 0.0235<br>wR <sub>2</sub> = 0.0599                  | R <sub>1</sub> = 0.0403<br>wR <sub>2</sub> = 0.0798               | R <sub>1</sub> = 0.0401<br>wR <sub>2</sub> = 0.0909              |
| Largest diff. peak and hole, e <sup>-</sup> ·Å <sup>-3</sup> | 0.892 and -0.840                                                | 0.953 and -0.779                                                      | 1.479 and -0.781                                                | 0.295 and -0.264                                                     | 0.318 and -0.253                                                  | 0.698 and -0.547                                                 |
| Absolute structure parameter                                 |                                                                 |                                                                       |                                                                 | 0.06(4)                                                              |                                                                   |                                                                  |
| CCDC number                                                  | 2282726                                                         | 2282727                                                               | 2282728                                                         | 2282729                                                              | 2282730                                                           | 2282731                                                          |



**Table S2.** Polyhedra analysis for potassium and cesium  $\beta$ -diketonate. The lowest residual factors **CShM** are highlighted in grey.

|                      |        |        |        |        |        |        |        |          |         |        |        |        |         |
|----------------------|--------|--------|--------|--------|--------|--------|--------|----------|---------|--------|--------|--------|---------|
|                      | OP-8   | HPY-8  | HBPY-8 | CU-8   | SAPR-8 | TDD-8  | JGBF-8 | JETBPY-8 | JBTPR-8 | BTPR-8 | JSD-8  | TT-8   | ETBPY-8 |
| Cs(Me..C2F5)         |        |        |        |        |        |        |        |          |         |        |        |        |         |
| Cs1                  | CCU-9  |        |        |        |        |        |        |          |         |        |        |        |         |
| Cs(Me..C3F7)(H2O)    |        |        |        |        |        |        |        |          |         |        |        |        |         |
| Cs1                  | 30.452 | 23.922 | 12.019 | 4.058  | 8.613  | 6.577  | 18.105 | 27.497   | 10.443  | 10.357 | 11.349 | 4.694  | 22.039  |
| Cs2                  | 26.511 | 16.482 | 9.183  | 6.051  | 7.570  | 6.484  | 15.971 | 21.776   | 9.714   | 9.249  | 10.798 | 6.769  | 18.564  |
| Cs3                  | 36.239 | 23.553 | 11.594 | 5.017  | 2.834  | 2.939  | 13.544 | 25.929   | 4.288   | 3.985  | 5.970  | 5.862  | 23.542  |
| Cs(Me..C3F7)         |        |        |        |        |        |        |        |          |         |        |        |        |         |
| Cs1                  | 26.354 | 8.938  | 17.980 | 18.222 | 13.108 | 13.338 | 19.897 | 25.444   | 13.842  | 12.621 | 15.672 | 18.372 | 22.164  |
| K(Me..C2F5)(H2O)     |        |        |        |        |        |        |        |          |         |        |        |        |         |
| K1                   | 33.185 | 23.328 | 12.201 | 4.182  | 5.535  | 3.743  | 18.727 | 27.918   | 7.885   | 7.249  | 9.518  | 4.546  | 23.401  |
| K2                   | 28.028 | 20.255 | 13.651 | 8.949  | 3.933  | 1.819  | 15.918 | 27.044   | 3.759   | 3.489  | 4.829  | 9.786  | 23.293  |
| K3                   | 32.551 | 24.273 | 10.293 | 3.492  | 2.700  | 2.751  | 15.511 | 26.255   | 5.293   | 4.374  | 7.172  | 4.409  | 23.504  |
| K(Me..C2F5)          |        |        |        |        |        |        |        |          |         |        |        |        |         |
| K1                   | 28.508 | 18.077 | 12.639 | 10.656 | 5.323  | 3.461  | 13.474 | 26.778   | 4.833   | 4.479  | 6.657  | 11.330 | 21.823  |
| K2                   | CTPR-7 |        |        |        |        |        |        |          |         |        |        |        |         |
| K(Me..C3F7)          |        |        |        |        |        |        |        |          |         |        |        |        |         |
| K1                   | 30.052 | 23.130 | 7.020  | 3.465  | 8.549  | 6.318  | 13.393 | 24.708   | 9.987   | 8.128  | 11.365 | 3.964  | 21.959  |
| Literature data      |        |        |        |        |        |        |        |          |         |        |        |        |         |
| Cs(Ph..CF3)(H2O)     |        |        |        |        |        |        |        |          |         |        |        |        |         |
| Cs1                  | 28.557 | 21.720 | 13.065 | 5.610  | 6.303  | 5.135  | 18.220 | 28.689   | 8.063   | 7.722  | 9.503  | 6.388  | 22.891  |
| Cs2                  | 30.803 | 25.099 | 14.017 | 12.456 | 3.584  | 2.069  | 10.376 | 27.674   | 3.166   | 3.146  | 2.245  | 13.278 | 25.370  |
| Cs('Bu..CF3)(H2O)    |        |        |        |        |        |        |        |          |         |        |        |        |         |
| Cs1                  | 24.995 | 20.759 | 8.147  | 4.960  | 7.253  | 6.501  | 14.412 | 22.692   | 9.261   | 8.022  | 10.431 | 5.657  | 20.489  |
| Cs2                  | 25.572 | 21.356 | 8.654  | 4.486  | 7.170  | 6.583  | 15.409 | 21.965   | 9.383   | 8.323  | 10.676 | 5.199  | 19.913  |
| Cs(Me..CF3)          |        |        |        |        |        |        |        |          |         |        |        |        |         |
| Cs1                  | 27.819 | 18.723 | 7.533  | 7.570  | 13.126 | 10.813 | 10.640 | 21.300   | 14.550  | 13.362 | 16.193 | 7.412  | 18.209  |
| K(Ph..CF3)(H2O)      |        |        |        |        |        |        |        |          |         |        |        |        |         |
| K1                   | 29.845 | 22.933 | 12.200 | 4.473  | 5.524  | 3.828  | 17.369 | 27.999   | 6.836   | 6.833  | 7.428  | 4.840  | 22.529  |
| K2                   | 30.089 | 22.976 | 13.013 | 8.879  | 2.540  | 2.310  | 11.671 | 23.979   | 2.618   | 2.723  | 2.505  | 9.741  | 23.182  |
| K(Cl-C6H4..CF3)(H2O) |        |        |        |        |        |        |        |          |         |        |        |        |         |
| K1                   | 26.378 | 19.096 | 7.898  | 4.356  | 6.445  | 5.320  | 14.748 | 22.394   | 8.811   | 8.186  | 9.909  | 5.021  | 20.160  |
| K2                   | 27.217 | 18.828 | 8.139  | 4.267  | 6.460  | 4.924  | 15.253 | 22.005   | 8.616   | 7.989  | 9.484  | 4.911  | 20.035  |

*Reference shape:* OP-8 – Octagon ( $D_{8h}$ ), HPY-8 – Heptagonal pyramid ( $C_{7v}$ ), HBPY-8 – Hexagonal bipyramid ( $D_{6h}$ ), CU-8 – Cube ( $O_h$ ), SAPR-8 – Square antiprism ( $D_{4d}$ ), TDD-8 – Triangular dodecahedron ( $D_{2d}$ ), JGBF-8 – Johnson gyrobifastigium J26 ( $D_{2d}$ ), JETBPY-8 – Johnson elongated triangular bipyramid J14 ( $D_{3h}$ ), JBTPR-8 – Biaugmented trigonal prism J50 ( $C_{2v}$ ), BTPR-8 – Biaugmented trigonal prism ( $C_{2v}$ ), JSD-8 – Snub diphonoid J84 ( $D_{2d}$ ), TT-8 – Triakis tetrahedron ( $T_d$ ), ETBPY-8 – Elongated trigonal bipyramid ( $D_{3h}$ ). CTPR-7 – Capped trigonal prism ( $C_{2v}$ ) and CCU-9 – Spherical-relaxed capped cube ( $C_{4v}$ ).
